# Supplementary material
Source: publisher figshare collection journal article supplement (https://karger.figshare.com/ndownloader/files/31558475)
Supplement: Supplementary file 1 [file 31558475]

**Appendix.** Definition of comorbidities

| Comorbidities | Codes |
| --- | --- |
| Diabetes | ICD-9 DX: 250.*0-250.*3  ICD-10 DX: E10.***, E11.*** |
| Hypertension | ICD-9 DX: 401.**-405.**  ICD-10 DX: I10-I13.**, I15.* |
| Hyperlipidemia | ICD-9 DX: 272.**  ICD-10 DX: E78.0, E78.2, E78.4, E78.5 |
| Coronary artery disease | ICD-9 DX: 410.*-410.9*, 411.*, 412, 413.*, 414.*, 429.2, 440.9  ICD-9 PX: 00.66, 36.01, 36.02, 36.05, 36.10, 36.11, 36.12, 36.13, 36.14, 36.15, 36.16, 36.17  ICD-10 DX: I20.*-I22.*, I24.*, I25.*, I70.90, I70.91  CPT: 33510, 33511, 33512, 33513, 33514, 33516, 33517, 33518, 33519, 33520, 33521, 33522, 33523, 33533, 33534, 33535, 33536, 33572, 92920, 92921, 92924, 92925, 92933, 92934, 92937, 92937, 92938, 92941, 92943, 92944, 92982, 92984, 92995, 92996, 93540, 93564, 93570, C9602, C9603, C9604, C9605, C9606, C9607, C9608, S2205, S2206, S2207, S2208, S2209 |
| Myocardial infarction | ICD-9 DX: 410.**, 412.**  ICD-10 DX: I21.***, I22.*, I25.2 |
| Dysrhythmia | ICD-9 DX: 427.0-427.4*, 427.6*, 427.8*, 785, 426.**  ICD-10 DX: I44.*-I45.*, I47.*-I49.*, R00.0, R00.1, |
| Congestive heart failure | ICD-9 DX: 428.*, 398.91, 402.01, 402.11, 404.01, 404.03, 404.11, 404.13, 404.91, 404.93  ICD-10 DX: I09.81, I11.0, I13.0, I13.2, I50.1-I50.4* |
| Cerebrovascular disease | ICD-9 DX: 430.*1, 431.*1, 432, 432.9, 434.*1, 434.*2, 434.*3, 434.*4, 434.*5, 434.*6, 434.*7, 434.*8, 434.*9, 435.*1, 436.*1  ICD-10 DX: G45.*, G97.31, G97.32, I60.*, I61.*, I63.*, I67,82, I67.89, I97.810, I97.811, I97.820, I97.821 |
| Chronic obstructive pulmonary disease | ICD-9 DX: 491.**, 492.**, 496.**, 493.2  ICD-10 DX: J40.*-J44.*, J47.* |
| Cancer | ICD-9 DX: I40.**-209.**  ICD-10 DX: C00.**-C96.**, C7A.** |
| Depression | ICD-9 DX: 311.**, 296.2*, 298.0*, 300.4*, 309.0*, 309.1*, 293.83, 309.28  ICD-10 DX: F32.**, F33.**, F39.**, F06.30, F34.1, F34,8, F43.21, F43.23 |
| Dementia | ICD-9 DX: 290.**, 294.**, 330.**, 331.**  ICD-10 DX: F01.50, F01.51, F02.80, F02.81, F03.90, F03.91, F04, F05, F06.0, F06.1, F06.8, F84.2, G13.2, G13.8, G30.*, G31.**, G91.*, G93.7, G93.89, G93.9, G94 |
